# Supplementary material
Source: PubMed Central journal article supplement (PMC2888491)
Supplement: NIHMS203486-supplement-01.pdf [file NIHMS203486-supplement-01.pdf]

Gas6-Axl pathway: The role of redox-dependent association of Axl with non-muscle  
myosin IIB

Megan E. Cavet, Elaine M. Smolock, Prashanthi Menon, Atsushi Konishi, Vyacheslav A.  
Korshunov and Bradford C. Berk\*

Aab Cardiovascular Research Institute and Department of Medicine, University of  
Rochester, Rochester, NY

Supplementary Data

\*To whom correspondence should be addressed:

Bradford C. Berk, MD, PhD  
University of Rochester  
Aab Cardiovascular Research Institute,  
601 Elmwood Ave, Box 679  
Rochester, NY 14642  
Phone: 585-273-1946  
Fax: 585-273-1497  
Email: Bradford\_Berk@urmc.rochester.edu

Running title: Redox sensitive Axl-MHC-IIB interaction

Supplementary Figures: 2

Figure S1

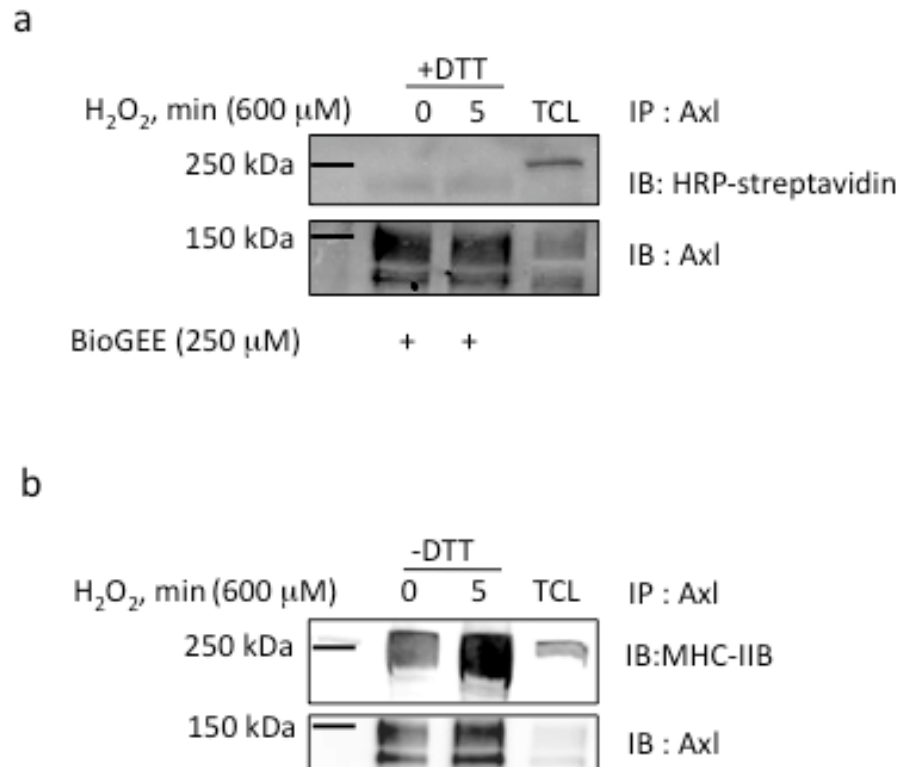

**Figure S1. a.** Cells were harvested with 1mM DTT in the lysis buffer to disrupt disulphide bonds. Axl was immunoprecipitated. Normal SDS-PAGE gel was performed and BioGEE labeled proteins were detected with HRP-streptavidin. Note: MHC-IIB the 225 kDa was not detected; TCL = total cell lysate. **b.** Cells were serum starved and stimulated with 600 μM H<sub>2</sub>O<sub>2</sub> for 5 min. Cells were harvested and Axl was immunoprecipitated. Normal SDS-PAGE gel was performed and probed for MHC-IIB. Note: Interaction between Axl and MHC-IIB increases upon stimulation.

Figure S2

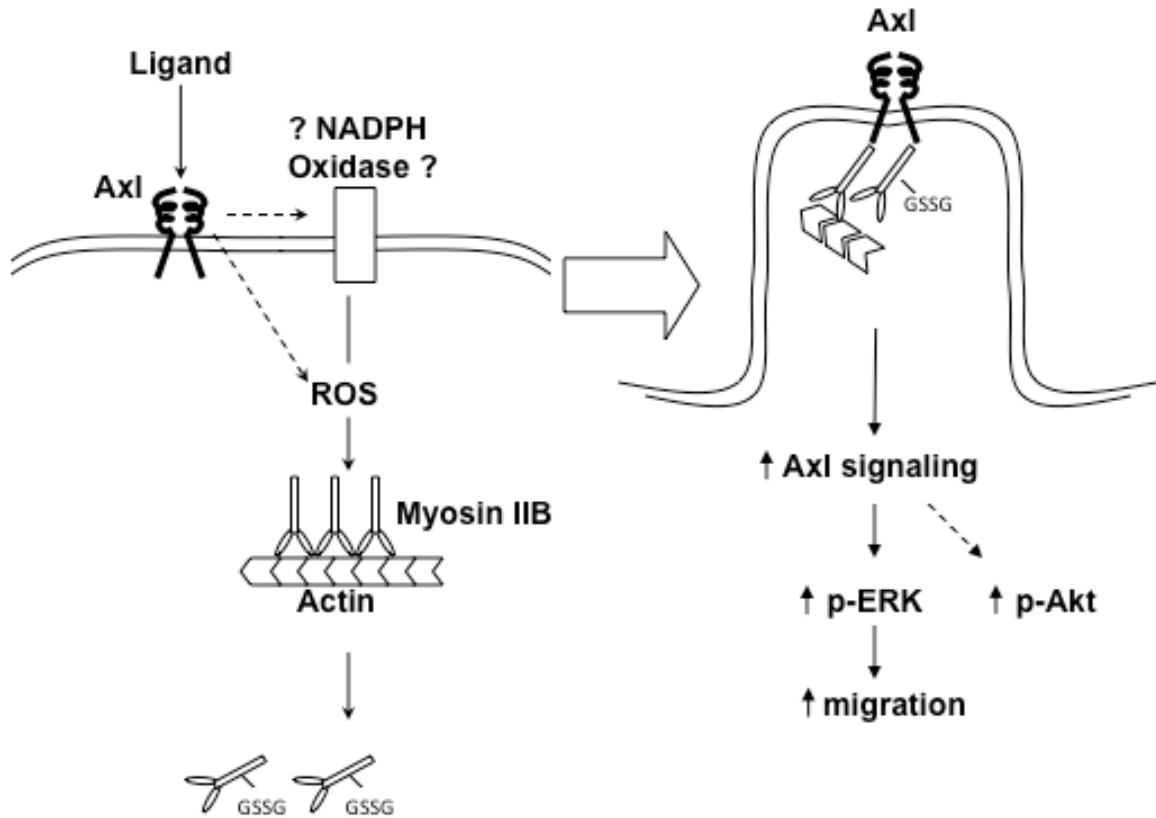

**Figure S2.** Proposed model: Upon Axl activation there is an increase in intracellular ROS. This results in glutathiolation of MHC-IIB, which promotes its interaction with Axl, activating Axl's pro-migratory signaling through ERK activation.
